# Supplementary material for: Management of Clinical T1N0M0 Esophageal Cancer
Source: PubMed Central journal article supplement — Gut Liver. 2019 Mar 15;13(3):315–24. doi: 10.5009/gnl18254 (PMC6529170; doi:10.5009/gnl18254), 2019-03-15
Supplement: gnl-13-315_Suppl.pdf [file gnl-13-315_Suppl.pdf]

**Supplementary Table 1.** Univariate and Multivariate Analyses of Patients

| Characteristic     | Univariate analysis |           |         | Multivariate analysis |           |         |
|--------------------|---------------------|-----------|---------|-----------------------|-----------|---------|
|                    | HR                  | 95% CI    | p-value | HR                    | 95% CI    | p-value |
| OS                 |                     |           |         |                       |           |         |
| Age                | 1.08                | 1.01–1.15 | 0.01    | 1.1                   | 1.02–1.18 | 0       |
| Sex                | 0.04                | 0.00–672  | 0.33    | 0                     | 0.00–9999 | 0.98    |
| T stage            | 3.76                | 1.06–13.3 | 0.02    | 2.14                  | 0.57–8.06 | 0.05    |
| Location           | 1                   | 0.53–1.86 | 0.77    | 0.96                  | 0.47–1.96 | 0.91    |
| Histology          | 0.22                | 0.00–9999 | 0.77    | 0                     | 0.00–9999 | 0.99    |
| Treatment modality | 1.82                | 1.04–3.18 | 0.03    | 2.14                  | 1.09–4.20 | 0.02    |
| RFS                |                     |           |         |                       |           |         |
| Age                | 1.04                | 0.99–1.10 | 0.07    | 1.03                  | 0.98–1.09 | 0.18    |
| Sex                | 0.04                | 0.00–60.7 | 0.39    | 0                     | 0.00–9999 | 0.98    |
| T stage            | 2.22                | 0.91–5.42 | 0.07    | 2.67                  | 0.91–7.86 | 0.07    |
| Location           | 0.86                | 0.53–1.40 | 0.55    | 0.92                  | 0.56–1.51 | 0.75    |
| Histology          | 0.22                | 0.00–9999 | 0.7     | 0                     | 0.00–9999 | 0.99    |
| Treatment modality | 0.96                | 0.75–1.24 | 0.78    | 0.85                  | 0.60–1.20 | 0.36    |

HR, hazard ratio; CI, confidence interval; OS, overall survival; RFS, recurrence-free survival.
